# Supplementary material for: Differential Triiodothyronine Responsiveness and Transport by Human Cytotrophoblasts from Normal and Growth-Restricted Pregnancies
Source: PubMed Central journal article supplement — J Clin Endocrinol Metab. 2010 Jul 21;95(10):4762–70. doi: 10.1210/jc.2010-0354 (PMC3050105; doi:10.1210/jc.2010-0354), 2010-07-21

**Supplemental figure 1:** Preliminary data demonstrating T3 uptake at 2, 5, 10 and 30 minutes from normal and IUGR cytotrophoblasts.

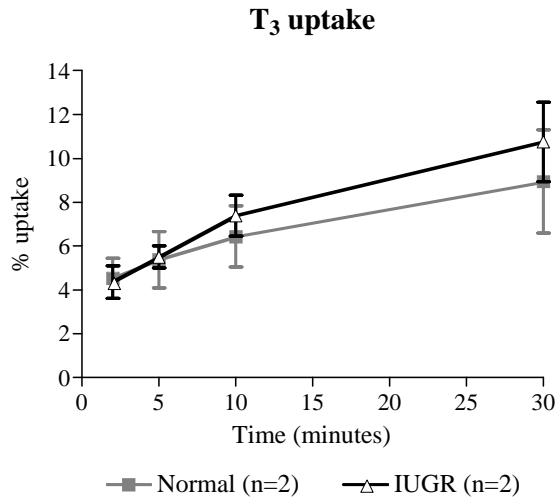

Supplement: jc.2010-0354_1.pdf [file jc.2010-0354_1.pdf]
